# Supplementary material for: Perception of Biocontrol Potential of Bacillus inaquosorum KR2-7 against Tomato Fusarium Wilt through Merging Genome Mining with Chemical Analysis
Source: Biology (Basel). 2022 Jan 14;11(1):137. doi: 10.3390/biology11010137 (PMC8773019; doi:10.3390/biology11010137)
Supplement: Supplementary file 1 [file biology-11-00137-s001.zip › biology-1517635-SI.pdf]

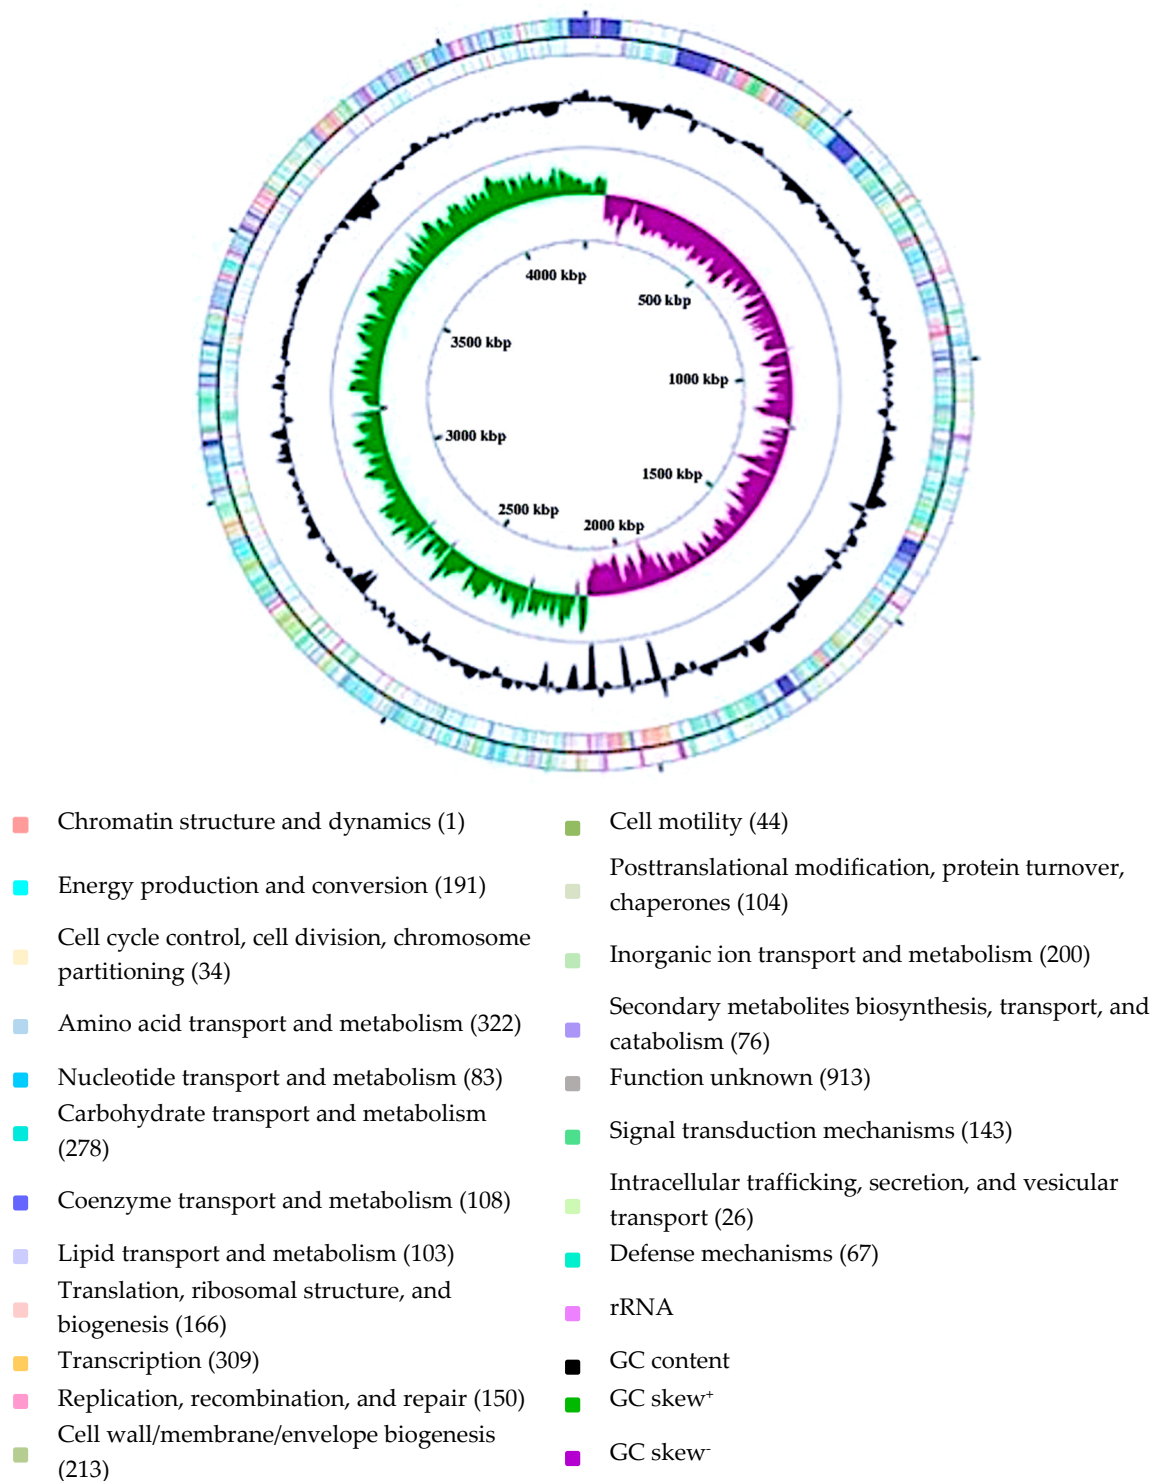

**Figure S1.** Circular map of the *B. inaquosorum* KR2-7 genome. Outermost circle (1st): all genes are color-coded according to their functions (see top right); 2nd circle: GC content (black); 3rd circle: GC skew<sup>+</sup> (green); 4th circle: GC skew<sup>-</sup> (violet); 5th circle: scale (bps). GC views were prepared using CGView Server V1.0 (<http://wishart.biology.ualberta.ca/cgview/>)

**Table S1.** The comparison of COG functional categories between *B. subtilis* KR2-7 and *B. velezensis* FZB42

| COG code | Description                                                      | KR2-7 | FZB42 |
|----------|------------------------------------------------------------------|-------|-------|
| B        | Chromatin structure and dynamics                                 | 1     | -     |
| C        | Energy production and conversion                                 | 191   | 169   |
| D        | Cell cycle control, cell division,<br>chromosome partitioning    | 34    | 37    |
| E        | Amino acid transport and metabolism                              | 322   | 275   |
| F        | Nucleotide transport and metabolism                              | 83    | 82    |
| G        | Carbohydrate transport and metabolism                            | 278   | 236   |
| H        | Coenzyme transport and metabolism                                | 108   | 120   |
| I        | Lipid transport and metabolism                                   | 103   | 122   |
| J        | Translation, ribosomal structure and<br>biogenesis               | 166   | 155   |
| K        | Transcription                                                    | 309   | 240   |
| L        | Replication, recombination and repair                            | 150   | 112   |
| M        | Cell wall/membrane/envelope biogenesis                           | 213   | 174   |
| N        | Cell motility                                                    | 44    | 61    |
| O        | Posttranslational modification, protein<br>turnover, chaperones  | 104   | 97    |
| P        | Inorganic ion transport and metabolism                           | 200   | 154   |
| Q        | Secondary metabolites biosynthesis,<br>transport and catabolism  | 76    | 64    |
| R        | General function prediction only                                 | -     | 337   |
| S        | Function unknown                                                 | 913   | 318   |
| T        | Signal transduction mechanisms                                   | 143   | 130   |
| U        | Intracellular trafficking, secretion, and<br>vesicular transport | 26    | 169   |
| V        | Defense mechanisms                                               | 67    | -     |

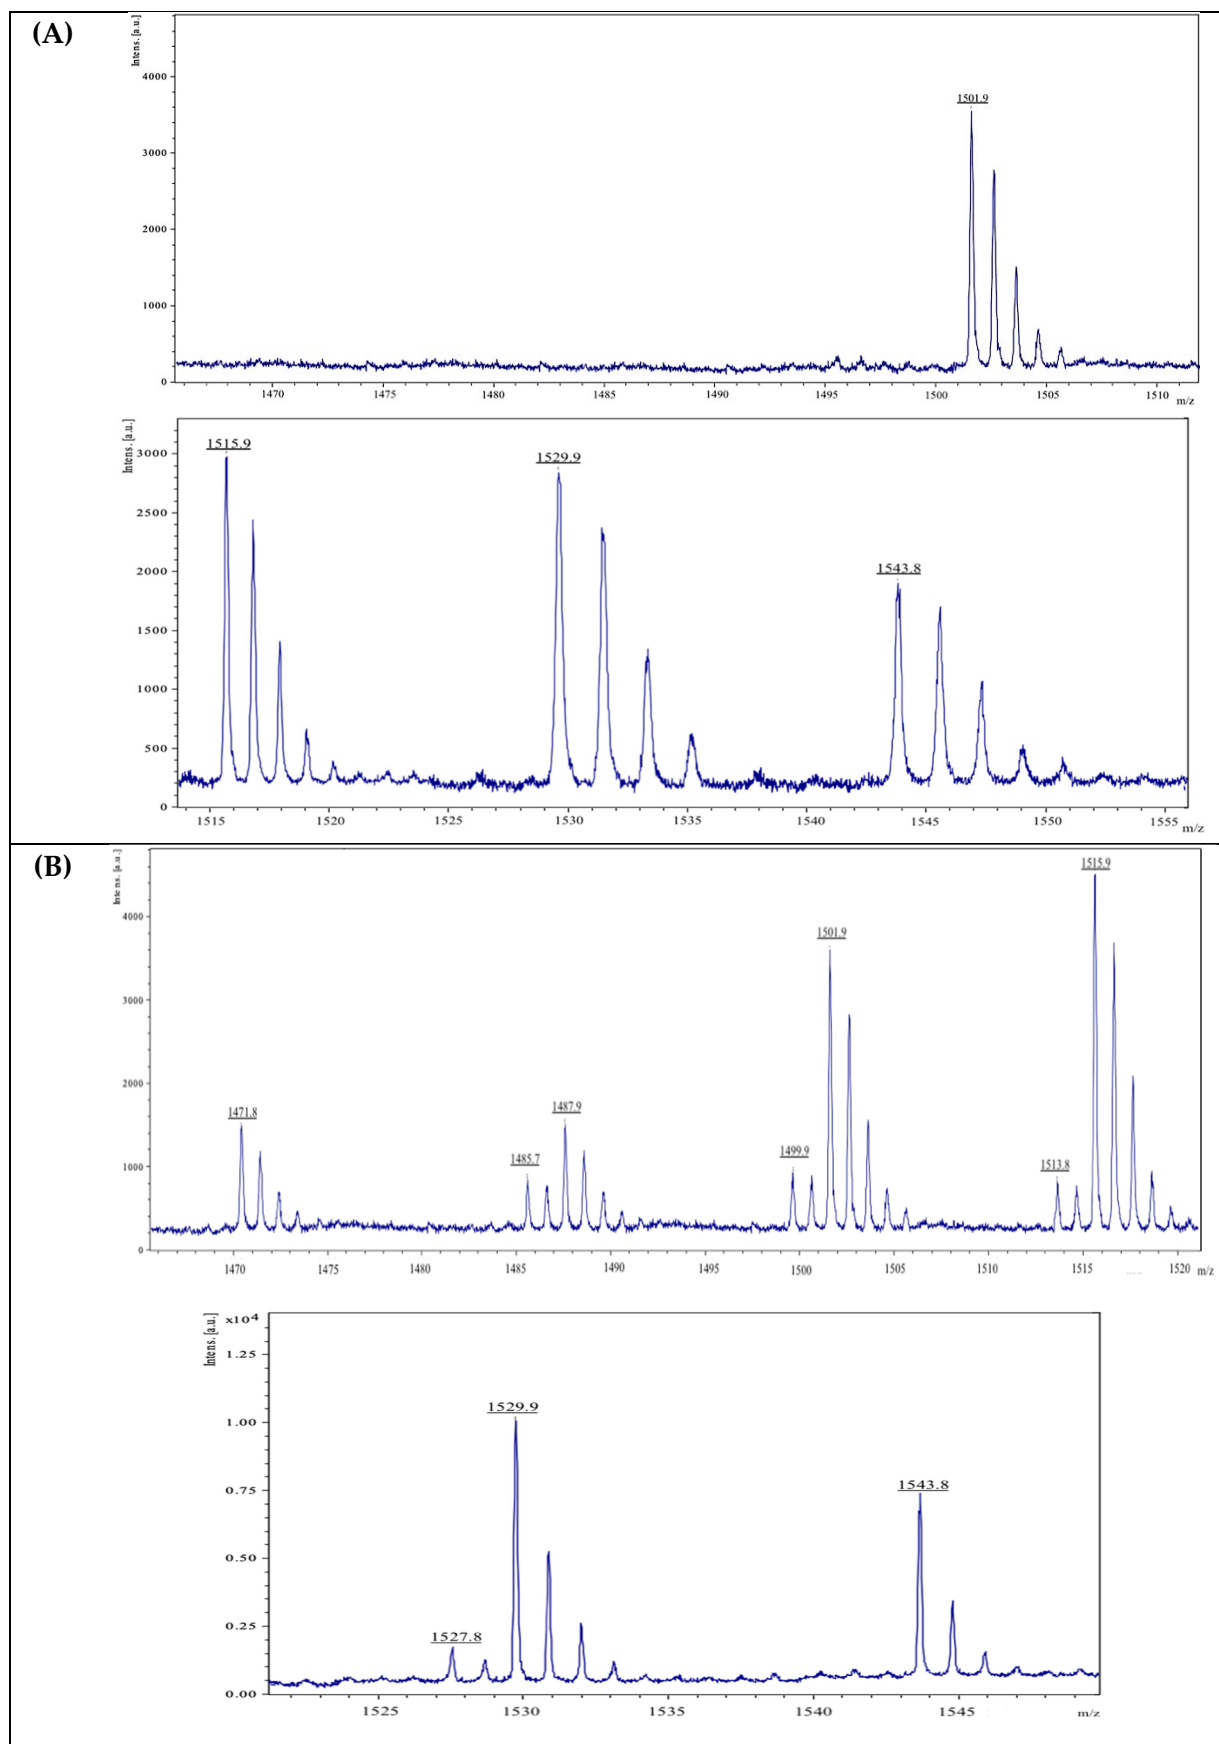

**Figure S2.** The fengycin mass peaks detected by MALDI-TOF mass spectrometry in A) control cell extract of KR2-7 and B) dual culture cell extract of KR2-7.

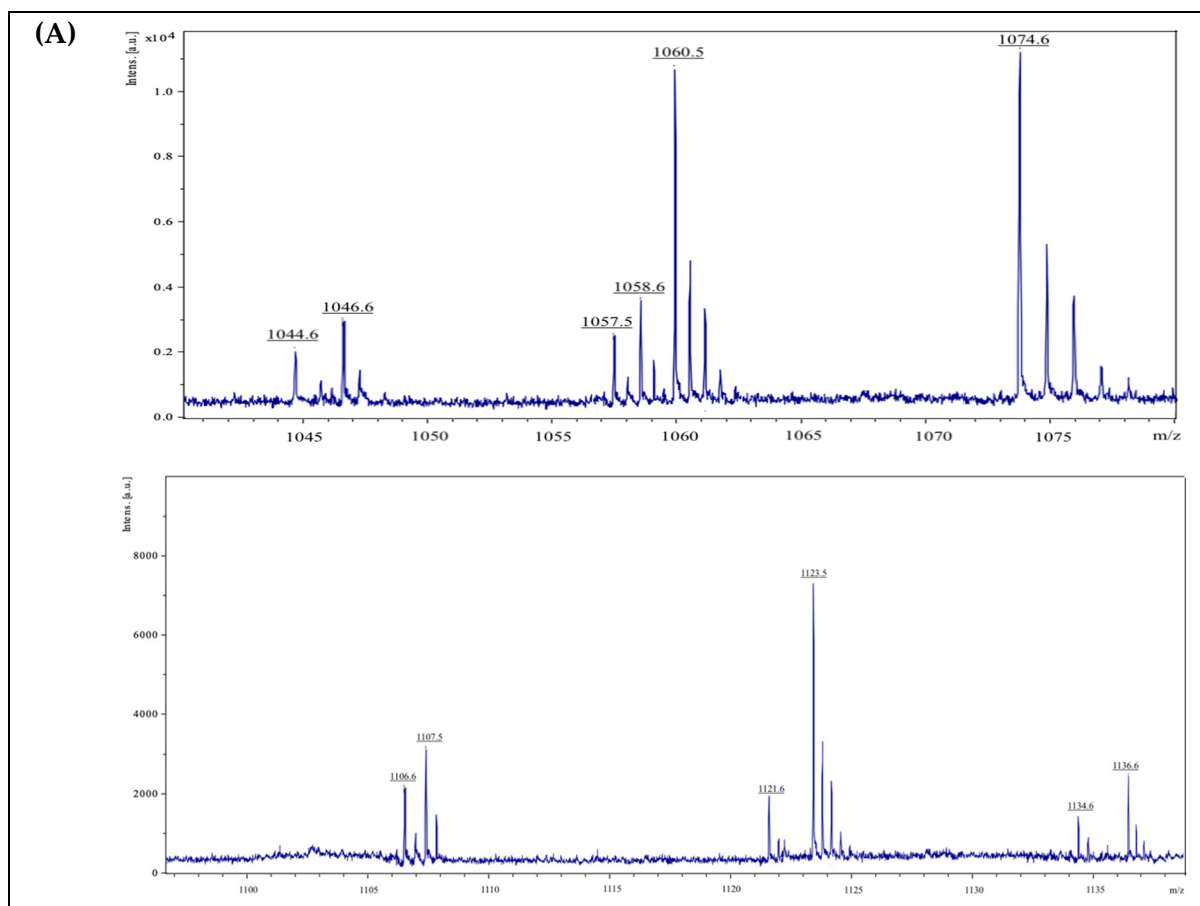

**Figure S3. (A)** The iturin, bacillomycin F, and surfactin mass peaks detected by MALDI-TOF mass spectrometry in A) control cell extract of KR2-7 and B) dual culture cell extract of KR2-7.

(B)

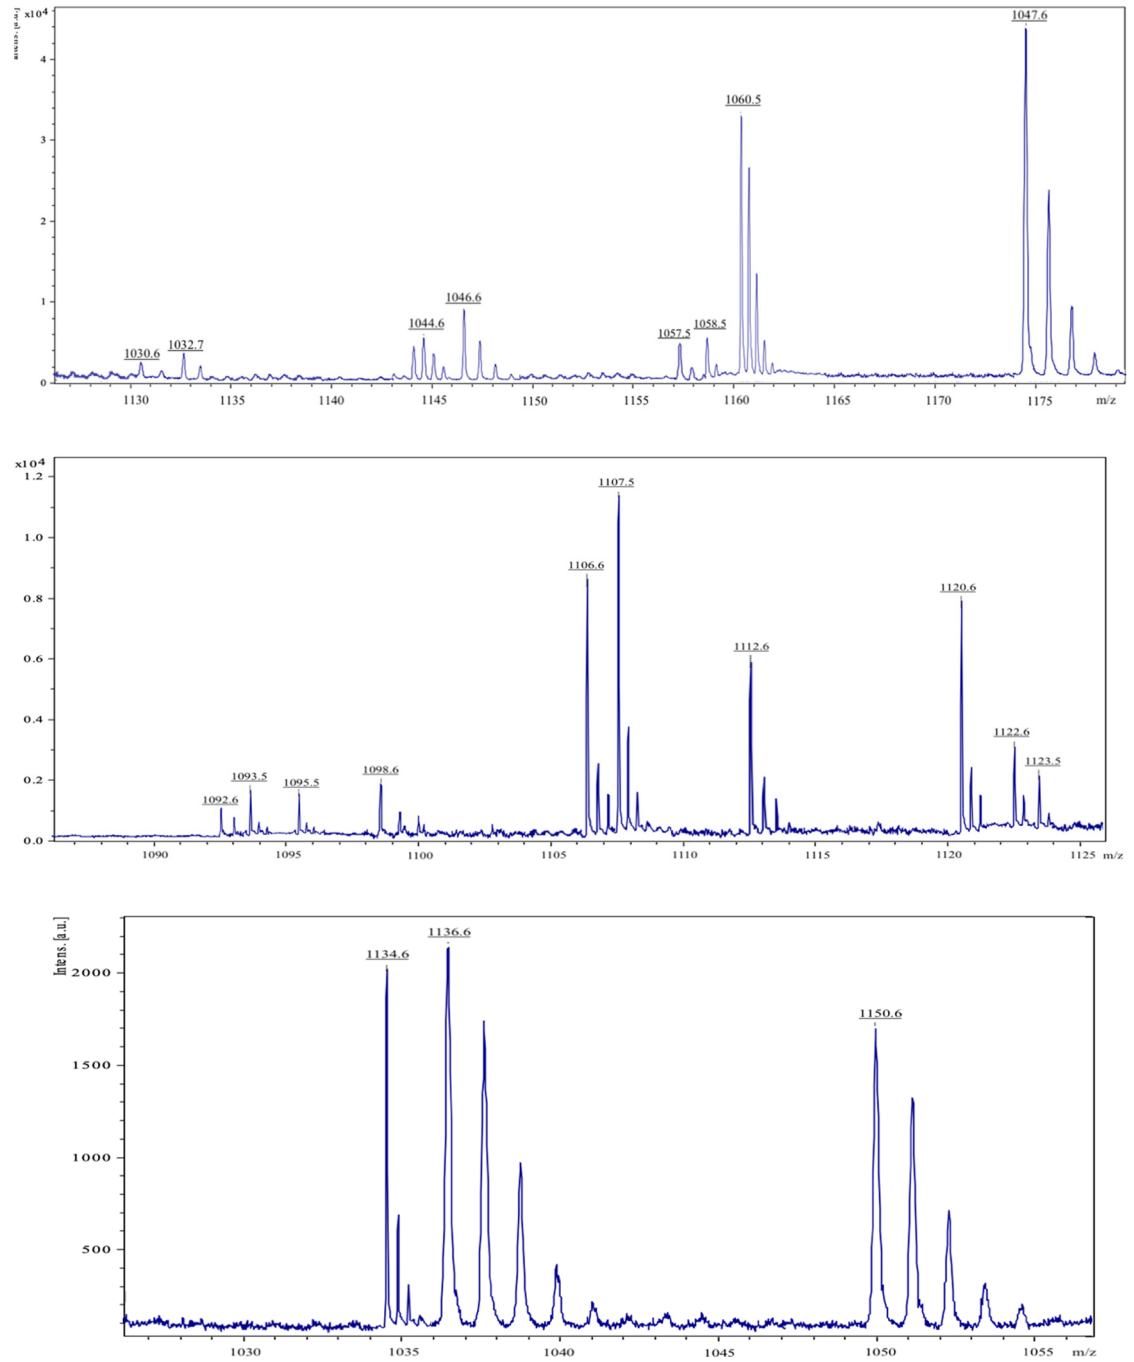

**Figure S3. (B)** The iturin, bacillomycin F, and surfactin mass peaks detected by MALDI-TOF mass spectrometry in A) control cell extract of KR2-7 and B) dual culture cell extract of KR2-7.
